# Supplementary material for: Pathological Response in the Breast and Axillary Lymph Nodes after Neoadjuvant Systemic Treatment in Patients with Initially Node-Positive Breast Cancer Correlates with Disease Free Survival: An Exploratory Analysis of the GeparOcto Trial
Source: MDPI journal article supplement (doi:10.3390/cancers14030521), 2022-01-20
Supplement: s1 [file s1]

**Figure S1.** Consort diagram.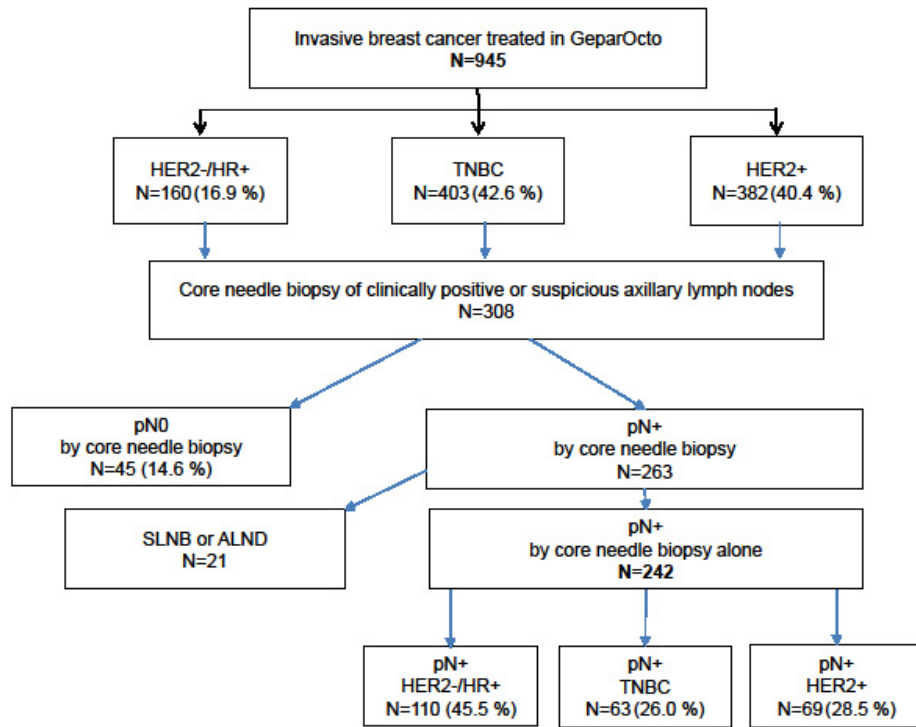

**Table S1.** Baseline characteristics of included patients before neoadjuvant systemic treatment.

| Parameter                                       | Category/<br>Statistic   | pN+ biopsy (N=242)<br>N (valid %) |
|-------------------------------------------------|--------------------------|-----------------------------------|
| Age, median (range), years                      | 47 (21, 74)              |                                   |
| Age (at diagnosis), years                       | < 40                     | 61 (25.2)                         |
|                                                 | ≥ 40                     | 181 (74.8)                        |
| Menopausal status                               | Premenopausal            | 150 (62.0)                        |
|                                                 | postmenopausal           | 92 (38.0)                         |
| BMI, kg/m <sup>2</sup>                          | < 25                     | 122 (50.4)                        |
|                                                 | ≥ 35                     | 120 (49.6)                        |
| cT                                              | cT1                      | 69 (28.7)                         |
|                                                 | cT2                      | 144 (60.0)                        |
|                                                 | cT3                      | 11 (4.6)                          |
|                                                 | cT4                      | 16 (6.7)                          |
|                                                 | missing                  | 2                                 |
| Tumor size by ultrasound, median<br>(range), mm | 27 (8, 147)              |                                   |
|                                                 | missing                  | 2                                 |
| Tumor localization                              | Unilateral               | 235 (97.1)                        |
|                                                 | Bilateral                | 7 (2.9)                           |
| Tumor focality                                  | Unifocal                 | 172 (71.1)                        |
|                                                 | Multifocal/centric       | 70 (28.9)                         |
| Grading                                         | G1                       | 2 (0.8)                           |
|                                                 | G2                       | 75 (31.0)                         |
|                                                 | G3                       | 165 (68.2)                        |
| Biological subtype                              | HR+ HER2-                | 110 (45.5)                        |
|                                                 | TNBC                     | 63 (26.0)                         |
|                                                 | HER2+                    | 69 (28.5)                         |
| Ki-67 (central)                                 | ≤20 %                    | 10 (4.1)                          |
|                                                 | >20%                     | 232 (95.9)                        |
| Histological tumor type                         | ductal or ductal-lobular | 201 (83.1)                        |
|                                                 | other                    | 41 (16.9)                         |
| LPBC                                            | no                       | 209 (86.4)                        |
|                                                 | yes                      | 33 (13.6)                         |
| Systemic treatment                              | EPC                      | 118 (48.8)                        |
|                                                 | PM(Cb)                   | 124 (51.2)                        |

Abbreviations: BMI, body-mass index; EPC, epirubicin, paclitaxel, cyclophosphamide; HR, hormone receptor; LPBC, lymphocyte-predominant breast cancer; PM(Cb), paclitaxel, non-pegylated liposomal doxorubicin (M, Myocet®), carboplatin; TNBC, triple-negative breast cancer

**Table S2.** Management of axillary lymph nodes after neoadjuvant systemic treatment dependent on clinical lymph node status.

| ycN  | Axilla surgery | pN+ biopsy (N=242)<br>N (%) |
|------|----------------|-----------------------------|
| ycN0 | None           | 0 (0.0)                     |
|      | SLNB           | 7 (5.4)                     |
|      | ALND           | 122 (94.6)                  |
|      | missing        | 3                           |
|      | total          | 132 (54.5)                  |
| ycN+ | None           | 0 (0.0)                     |
|      | SLNB           | 7 (9.1)                     |

| ycN               | Axilla surgery | pN+ biopsy (N=242)<br>N (%) |
|-------------------|----------------|-----------------------------|
|                   | ALND           | 70 (90.9)                   |
|                   | missing        | 0                           |
|                   | total          | 77 (31.8)                   |
| ycNx <sup>a</sup> | None           | 0 (0.0)                     |
|                   | SLNB           | 2(6.1)                      |
|                   | ALND           | 31 (93.9)                   |
|                   | missing        | 0                           |
|                   | total          | 33 (13.6)                   |

Abbreviations: ALND, axillary lymph node dissection; SLNB, sentinel lymph node biopsy. <sup>a</sup> ycNx = missing clinical axilla evaluation before surgery

**Table S3.** pCR rates in lymph nodes and breast according to different definitions and according to biological tumor type in patients with pN+ at baseline.

| pCR definition               | Biological subtype | pCR N (%)  | No pCR N (%) | p-value <sup>e</sup> |
|------------------------------|--------------------|------------|--------------|----------------------|
| ypT0/Tis ypN0 <sup>a</sup>   | HR+ HER2- (N=110)  | 16 (14.6)  | 94 (85.4)    | <0.001               |
|                              | TNBC (N=63)        | 38 (60.3)  | 25 (39.7)    |                      |
|                              | HER2+ (N=69)       | 46 (66.7)  | 23 (33.3)    |                      |
|                              | Overall (N=242)    | 100 (41.3) | 142 (58.7)   |                      |
| ypT0 ypN0 <sup>b</sup>       | HR+ HER2- (N=110)  | 14 (12.7)  | 96 (87.3)    | <0.001               |
|                              | TNBC (N=63)        | 36 (57.1)  | 27 (42.9)    |                      |
|                              | HER2+ (N=69)       | 41 (59.4)  | 28 (40.6)    |                      |
|                              | Overall (N=242)    | 91 (37.6)  | 151 (62.4)   |                      |
| ypT0/Tis ypN0/+ <sup>c</sup> | HR+ HER2- (N=110)  | 19 (17.3)  | 91 (82.7)    | <0.001               |
|                              | TNBC (N=63)        | 41 (65.1)  | 22 (34.9)    |                      |
|                              | HER2+ (N=69)       | 49 (71.0)  | 20 (29.1)    |                      |
|                              | Overall (N=242)    | 109 (45.0) | 133 (55.0)   |                      |
| ypT0 ypN0/+ <sup>d</sup>     | HR+ HER2- (N=110)  | 14 (12.7)  | 96 (87.3)    | <0.001               |
|                              | TNBC (N=63)        | 39 (61.9)  | 24 (38.1)    |                      |
|                              | HER2+ (N=69)       | 42 (60.9)  | 27 (39.1)    |                      |
|                              | Overall (N=242)    | 95 (39.3)  | 147 (60.7)   |                      |
| ypN0                         | HR+ HER2- (N=110)  | 35 (31.8)  | 75 (68.2)    | <.001                |
|                              | TNBC (N=63)        | 43 (68.3)  | 20 (31.7)    |                      |
|                              | HER2+ (N=69)       | 56 (81.2)  | 13 (18.8)    |                      |
|                              | Overall (N=242)    | 134 (55.4) | 108 (44.6)   |                      |

Abbreviations: HR, hormone receptor; pCR, pathological complete response; TNBC, triple-negative breast cancer;

<sup>a</sup> ypT0/Tis ypN0: no invasive residuals in breast and nodes; intraductal residuals allowed

<sup>b</sup> ypT0 ypN0: no invasive and no non-invasive residuals in breast and lymph nodes

<sup>c</sup> ypT0/Tis ypN0/+: no invasive residual tumor in the breast, intraductal residuals allowed, irrespective of nodal status after therapy

<sup>d</sup> ypT0/Tis ypN0/+ : no invasive and no non-invasive residuals in the breast, irrespective of nodal status after therapy

<sup>e</sup> comparing pCR rates between biological subtypes for each definition

**Table S4.** Multivariate logistic regression for pCR-LN (with and without pCR-B as a covariate), pCR-B and for tpCR in all 242 patients with pN+ by biopsy.

|                                    |                                             | pCR-LN (ypN0) |               |         | pCR-LN (ypN0)<br>with pCR-B in the model |              |         | pCR-B (ypT0/is ypN0/+) |              |         | tpCR (ypT0/is ypN0) |               |         |
|------------------------------------|---------------------------------------------|---------------|---------------|---------|------------------------------------------|--------------|---------|------------------------|--------------|---------|---------------------|---------------|---------|
| Parameter                          | Level                                       | OR            | 95% CI        | p-value | OR                                       | 95% CI       | p-value | OR                     | 95% CI       | p-value | OR                  | 95% CI        | p-value |
| Age, years                         | <40                                         |               |               |         |                                          |              |         |                        |              |         |                     |               |         |
|                                    | ≥40                                         | 0.87          | (0.44, 1.74)  | 0.695   | 1.38                                     | (0.57, 3.34) | 0.474   | 0.51                   | (0.24, 1.05) | 0.068   | 0.59                | (0.28, 1.22)  | 0.153   |
| cT                                 | cT4                                         |               |               |         |                                          |              |         |                        |              |         |                     |               |         |
|                                    | cT1-3                                       | 6.80          | (1.58, 29.3)  | 0.010   | 14.6                                     | (2.35, 90.3) | 0.004   | 1.44                   | (0.37, 5.50) | 0.598   | 3.33                | (0.77, 14.4)  | 0.108   |
| Tumor size by<br>ultrasound,<br>mm | ≤23.0<br>(median)                           |               |               |         |                                          |              |         |                        |              |         |                     |               |         |
|                                    | >23.0                                       | 0.90          | (0.49, 1.67)  | 0.738   | 1.06                                     | (0.50, 2.36) | 0.885   | 0.75                   | (0.40, 1.41) | 0.375   | 1.00                | (0.53, 1.88)  | 0.997   |
| Biological<br>subtype              | HER2-/HR+                                   |               |               | <.001   |                                          |              | 0.096   |                        |              | <.001   |                     |               | <.001   |
|                                    | TNBC                                        | 3.55          | (1.71, 7.37)  | <.001   | 1.04                                     | (0.38, 2.80) | 0.943   | 7.79                   | (3.59, 16.9) | <.001   | 7.48                | (3.41, 16.41) | <.001   |
|                                    | HER2+                                       | 8.94          | (4.02, 19.89) | <.001   | 2.69                                     | (1.04, 6.96) | 0.041   | 12.6                   | (5.77, 27.7) | <.001   | 12.21               | (5.52, 27.01) | <.001   |
| Grading                            | G1-2                                        |               |               |         |                                          |              |         |                        |              |         |                     |               |         |
|                                    | G3                                          | 2.19          | (1.12, 4.28)  | 0.022   | 2.59                                     | (1.13, 5.96) | 0.025   | 1.29                   | (0.64, 2.61) | 0.483   | 1.59                | (0.78, 3.27)  | 0.205   |
| Ki67, %                            | <20%                                        |               |               |         |                                          |              |         |                        |              |         |                     |               |         |
|                                    | ≥20%                                        | 0.89          | (0.16, 4.92)  | 0.891   | 0.77                                     | (0.10, 5.97) | 0.800   | 1.15                   | (0.25, 5.31) | 0.858   | 0.89                | (0.19, 4.10)  | 0.878   |
| LPBC                               | no                                          |               |               |         |                                          |              |         |                        |              |         |                     |               |         |
|                                    | yes                                         | 3.39          | (1.29, 8.96)  | 0.014   | 2.17                                     | (0.66, 7.13) | 0.202   | 3.08                   | (1.24, 7.68) | 0.016   | 2.69                | (1.10, 6.53)  | 0.030   |
| Histological<br>tumor type         | ductal or<br>ductal-<br>lobular<br>invasive |               |               |         |                                          |              |         |                        |              |         |                     |               |         |

|           |         | pCR-LN (ypN0) |              |         | pCR-LN (ypN0)<br>with pCR-B in the model |              |         | pCR-B (ypT0/is ypN0/+) |              |         | tpCR (ypT0/is ypN0) |              |         |
|-----------|---------|---------------|--------------|---------|------------------------------------------|--------------|---------|------------------------|--------------|---------|---------------------|--------------|---------|
| Parameter | Level   | OR            | 95% CI       | p-value | OR                                       | 95% CI       | p-value | OR                     | 95% CI       | p-value | OR                  | 95% CI       | p-value |
|           | other   | 1.03          | (0.46, 2.31) | 0.942   | 0.88                                     | (0.31, 2.51) | 0.817   | 1.32                   | (0.59, 2.98) | 0.499   | 1.17                | (0.52, 2.65) | 0.702   |
| Arm       | EPC     |               |              |         |                                          |              |         |                        |              |         |                     |              |         |
|           | PM(Cb)  | 0.89          | (0.49, 1.64) | 0.713   | 0.67                                     | (0.32, 1.41) | 0.292   | 1.28                   | (0.68, 2.38) | 0.445   | 1.41                | (0.75, 2.65) | 0.285   |
| pCR-B     | ypT+    | -             | -            | -       |                                          |              |         | -                      | -            | -       | -                   | -            | -       |
|           | ypT0/is | -             | -            | -       | 31.7                                     | (12.0, 84.0) | <.001   | -                      | -            | -       | -                   | -            | -       |

Abbreviations: CI, confidence interval; EPC, epirubicin, paclitaxel, cyclophosphamide; HR, hormone receptor; LPBC, lymphocyte-predominant breast cancer; OR, odds ratio; PM(Cb), paclitaxel, non-pegylated liposomal doxorubicin (M, Myocet®), carboplatin; TNBC, triple-negative breast cancer;
